# Supplementary material
Source: publisher figshare collection journal article supplement (https://frontiersin.figshare.com/ndownloader/files/32502467)
Supplement: Supplementary file 2 [file 32502467]

**Supplementary Table 2.** Percentage of *L. major* promastigotes at each stage of the cell cycle after exposure to ionizing radiation.

| Day | Lineage | Cell cycle stage |       |       |       |       | 4N/2N ratio | Total cells analyzed | p value <sup>a</sup> |
|-----|---------|------------------|-------|-------|-------|-------|-------------|----------------------|----------------------|
|     |         | <G1              | G1    | S     | G2    | >G2   |             |                      |                      |
| 0   | WT      | 18,82            | 44,48 | 8,01  | 25,65 | 26,84 | 1,99        | 11757                | 0,479                |
|     | pXG1    | 20,78            | 35,63 | 15,01 | 20,48 | 8,10  | 2,04        | 11575                |                      |
|     | EXO1    | 17,06            | 39,32 | 9,21  | 25,94 | 8,47  | 2,05        | 11914                |                      |
| 1   | WT      | 21,28            | 44,27 | 11,56 | 20,6  | 21,13 | 1,99        | 12981                | 0,447                |
|     | pXG1    | 16,59            | 43,41 | 7,56  | 25,72 | 6,72  | 2,04        | 11929                |                      |
|     | EXO1    | 15,84            | 38,26 | 10,75 | 24,95 | 10,2  | 1,95        | 12104                |                      |
| 2   | WT      | 16,99            | 48,03 | 11,09 | 20,42 | 29,49 | 2,02        | 12260                | 0,424                |
|     | pXG1    | 18,03            | 40,11 | 8,06  | 25,73 | 8,06  | 1,95        | 12023                |                      |
|     | EXO1    | 14,32            | 42,22 | 7,69  | 23,33 | 12,44 | 1,95        | 14511                |                      |
| 3   | WT      | 17,69            | 43,07 | 12,22 | 22,01 | 29,82 | 2,03        | 13407                | 0,336                |
|     | pXG1    | 16,63            | 38,25 | 7,19  | 30,12 | 7,8   | 1,95        | 12542                |                      |
|     | EXO1    | 15,21            | 37,66 | 6,41  | 26,27 | 14,46 | 1,95        | 13203                |                      |
| 4   | WT      | 16,02            | 43,46 | 9,79  | 26,71 | 34,04 | 2,05        | 13084                | 0,184                |
|     | pXG1    | 15,23            | 43,15 | 6,84  | 23,81 | 10,97 | 2,02        | 13533                |                      |
|     | EXO1    | 19,67            | 29,23 | 8,06  | 27,98 | 15,06 | 1,96        | 14339                |                      |
| 5   | WT      | 21,44            | 40,99 | 9,62  | 22,29 | 30,79 | 1,99        | 13373                | 0,177                |
|     | pXG1    | 15,44            | 33,6  | 10,74 | 27,58 | 12,65 | 1,95        | 12972                |                      |
|     | EXO1    | 23,38            | 33,14 | 2,76  | 29,85 | 10,87 | 1,95        | 14798                |                      |
| 6   | WT      | 25,24            | 43,76 | 10,84 | 17,39 | 30,37 | 2,08        | 12666                | 0,227                |
|     | pXG1    | 22,05            | 37,46 | 9,79  | 21,53 | 9,17  | 1,99        | 12231                |                      |
|     | EXO1    | 23,34            | 29,87 | 8,1   | 27,6  | 11,1  | 1,95        | 14195                |                      |
| 7   | WT      | 20,57            | 40,61 | 10,51 | 25,17 | 26,16 | 1,99        | 11570                | 0,852                |
|     | pXG1    | 15,7             | 39,8  | 11,14 | 27,9  | 5,47  | 1,98        | 11659                |                      |
|     | EXO1    | **               | **    | **    | **    | **    | **          | **                   |                      |
| 8   | WT      | 14,86            | 55,25 | 10,79 | 15,88 | 24,89 | 2,06        | 12488                | <0,0005              |
|     | pXG1    | 18,2             | 42,48 | 9,19  | 25,13 | 5     | 2,01        | 11760                |                      |
|     | EXO1    | 42,91            | 29,13 | 10,79 | 9,96  | 7,21  | 2           | 16711                |                      |
| 9   | WT      | 19,97            | 64,67 | 4,23  | 10,78 | 11,99 | 2,14        | 12085                | <0,0005              |
|     | pXG1    | 7,7              | 57,33 | 7,5   | 22,83 | 4,64  | 2,11        | 11019                |                      |
|     | EXO1    | 27,13            | 34,47 | 8,95  | 22,94 | 6,51  | 2,14        | 13343                |                      |
