# Supplementary material
Source: publisher figshare collection journal article supplement (https://frontiersin.figshare.com/ndownloader/files/32502467)
Supplement: Supplementary file 3 [file 32502467]

**Supplementary Table 1.** List of primers used in the present work.

| Primer name   | Sequence (5' to 3')      | Tm*  | Product size (bp) | Efficiency | Purpose       |
|---------------|--------------------------|------|-------------------|------------|---------------|
| LmjEXO1-F1    | ATGGGAATCAAAGGTCTCTG     | 52.0 | 3,042             | NA**       | <i>LmEXO1</i> |
| LmjEXO1-R1    | CTATGTCTTCTTGAACAACATC   | 49.2 |                   |            | cloning       |
| LmjEXO1-PW1-F | The same as LmjEXO1-F1   | 52.0 | 1,980             | NA**       | Insert        |
| LmjEXO1-PW1-R | GTGCGCCAACGAAGCAAA       | 57.0 |                   |            | sequencing    |
| LmjEXO1-PW2-F | CATCACGCTTCCGAGAGACT     | 56.7 | 1,997             | NA**       | by primer     |
| LmjEXO1-PW2-R | CACGGTTGCACTGCCAATAG     | 56.8 |                   |            | walking       |
| LmjEXO1-PW3-F | CAGCGACCACATAACTCCGT     | 57.2 | 2,037             | NA**       |               |
| LmjEXO1-PW3-R | The same as LmjEXO1-R1   | 49.2 |                   |            |               |
| LmjEXO1-QF    | GCACTGCTGTGTGCGAGCATTGGT | 68.0 | 90                | 90%        | qPCR          |
| LmjEXO1-QR    | GCACCAACATGTGCACCCCCGA   | 68.3 |                   |            |               |
| LmjG6PD-QF    | ACCGCATTGACCACTACCTC     | 62.0 | 102               | 96%        |               |
| LmjG6PD-QR    | GATGTTGTTTCGAGTTCCAC     | 56.0 |                   |            |               |

\*Tm: melting temperature in °C.

\*\*NA: Not applicable.
